# Supplementary figures and images for: A Histidine pH sensor regulates activation of the Ras-specific guanine nucleotide exchange factor RasGRP1
Source: eLife journal article supplement (doi:10.7554/elife.29002), 2017-09-27

**A**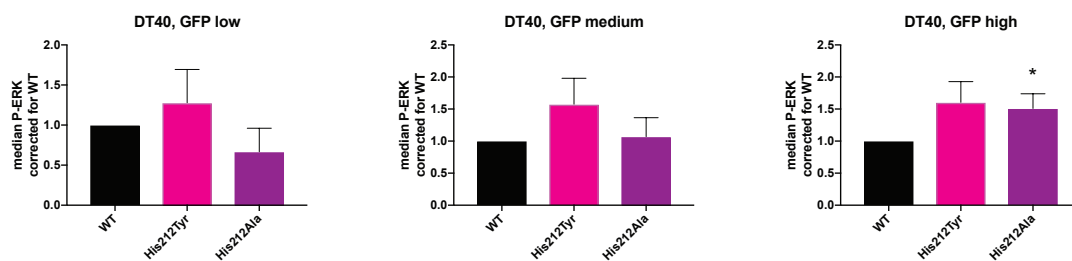**B**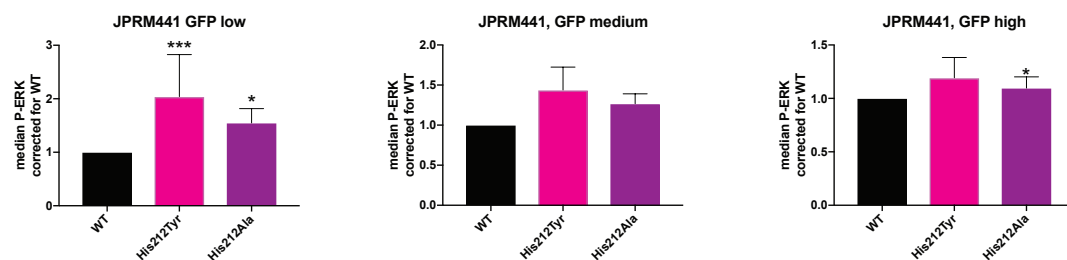**C**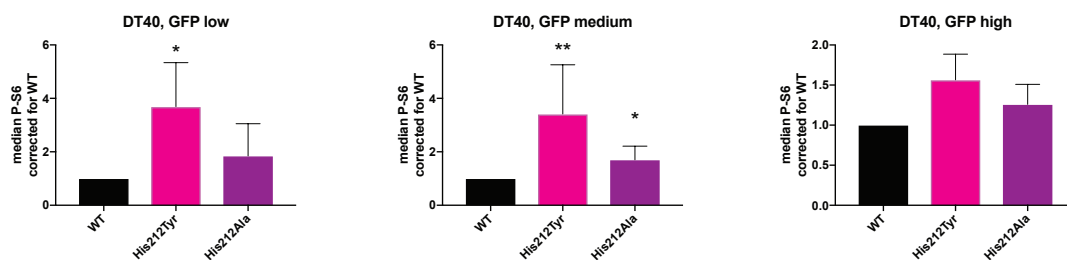**D**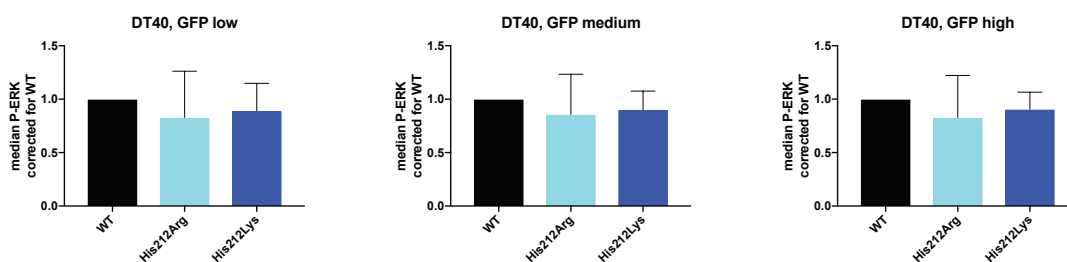**E**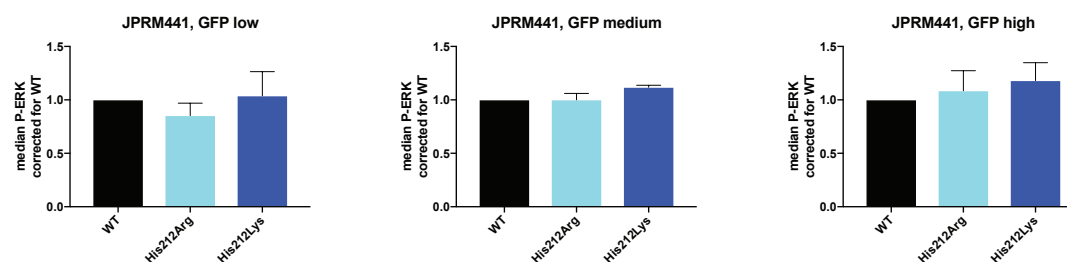**F**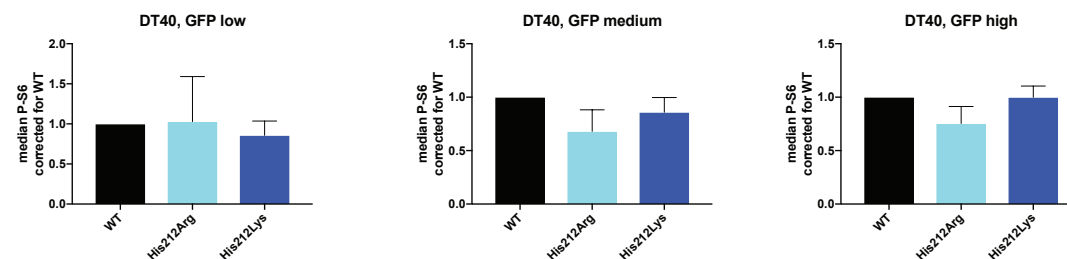

Supplement: supp [file elife-29002-supp-v1.zip]

**A**

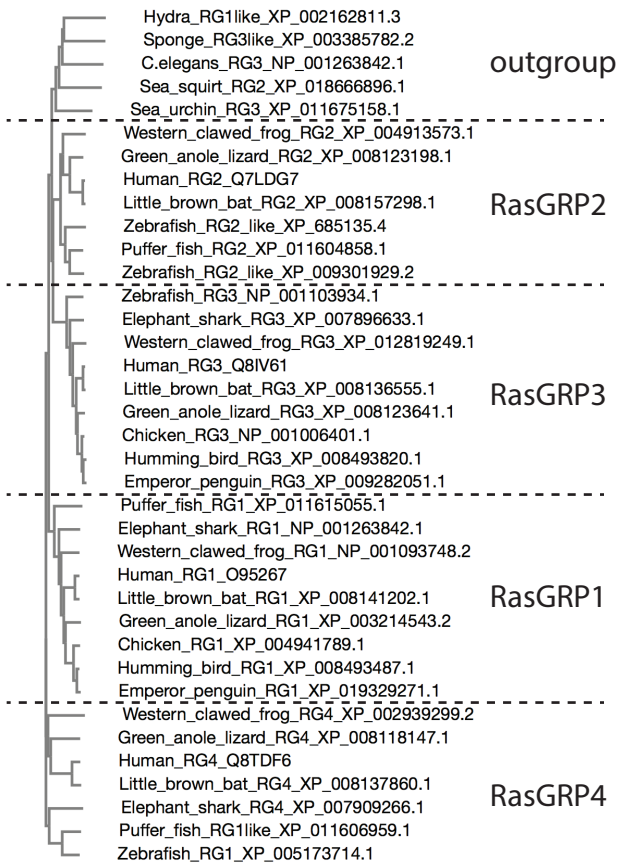

**B**

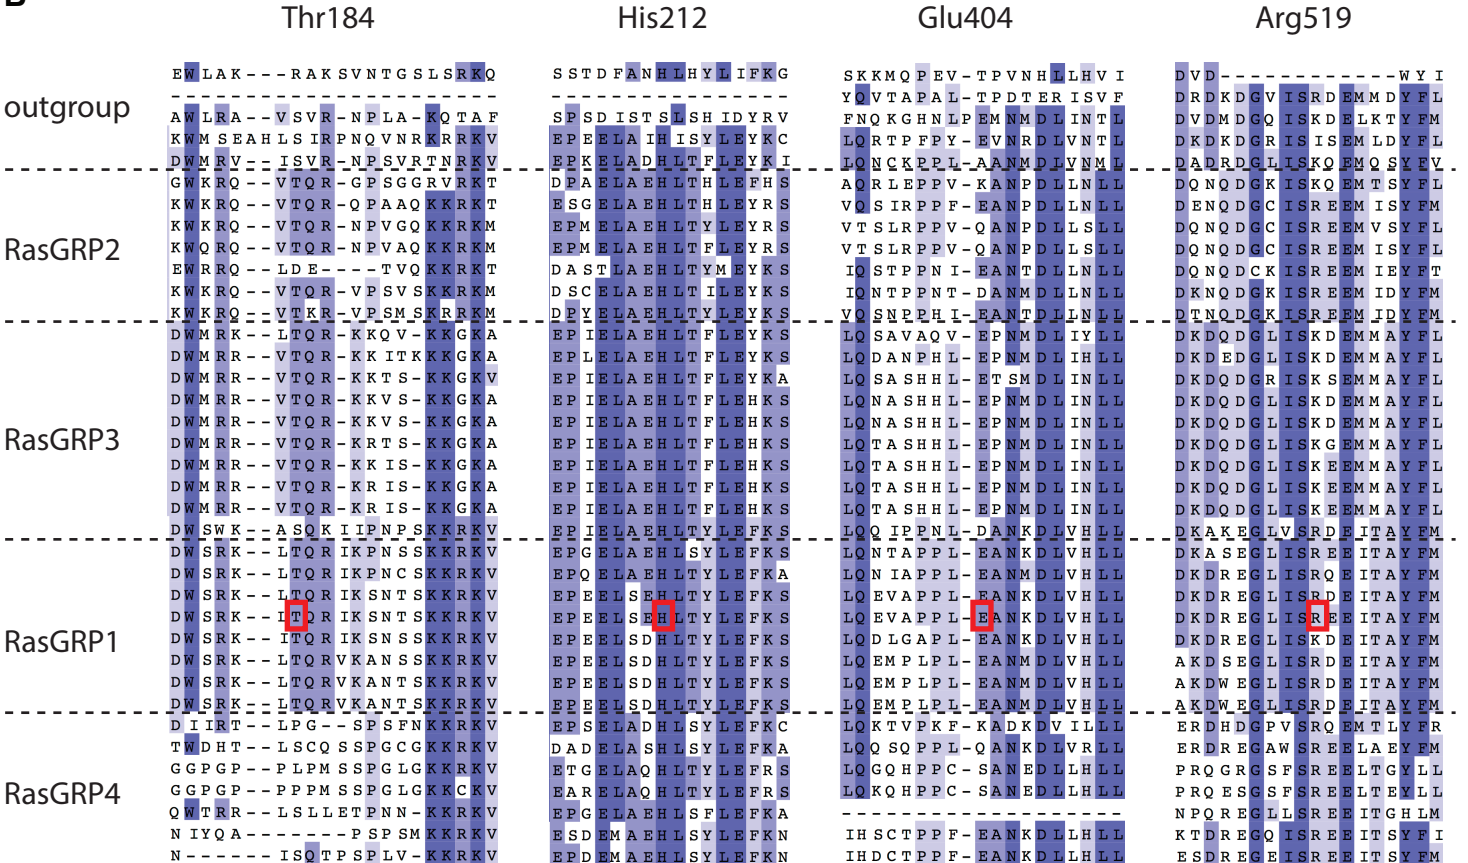

Supplement: supp [file elife-29002-supp-v1.zip]

**A**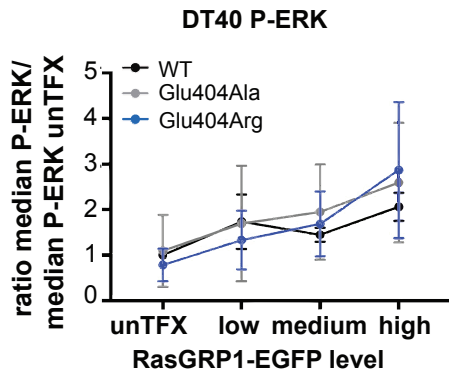**B**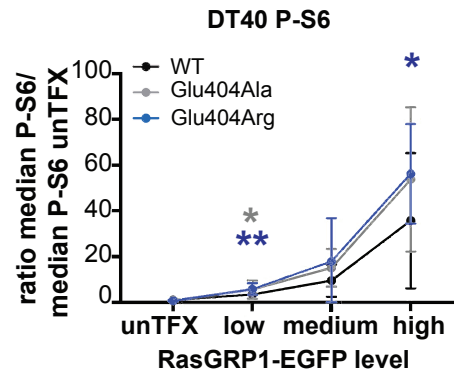**C**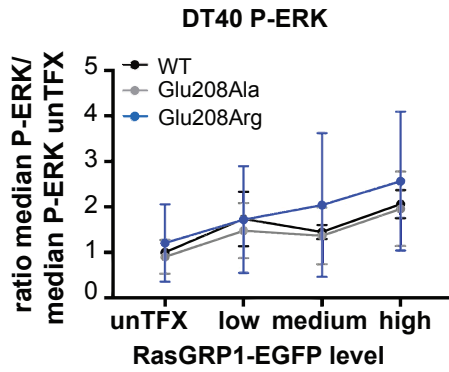**D**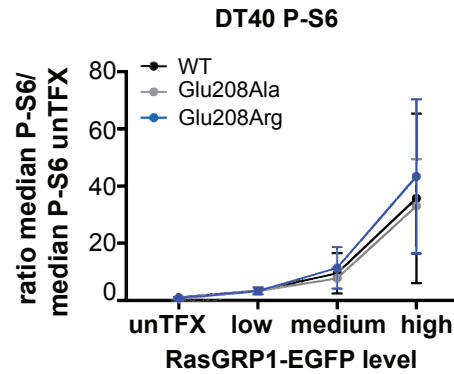

Vercoulen, Figure 7 supplement

Supplement: supp [file elife-29002-supp-v1.zip]

**A**

GFP low gate

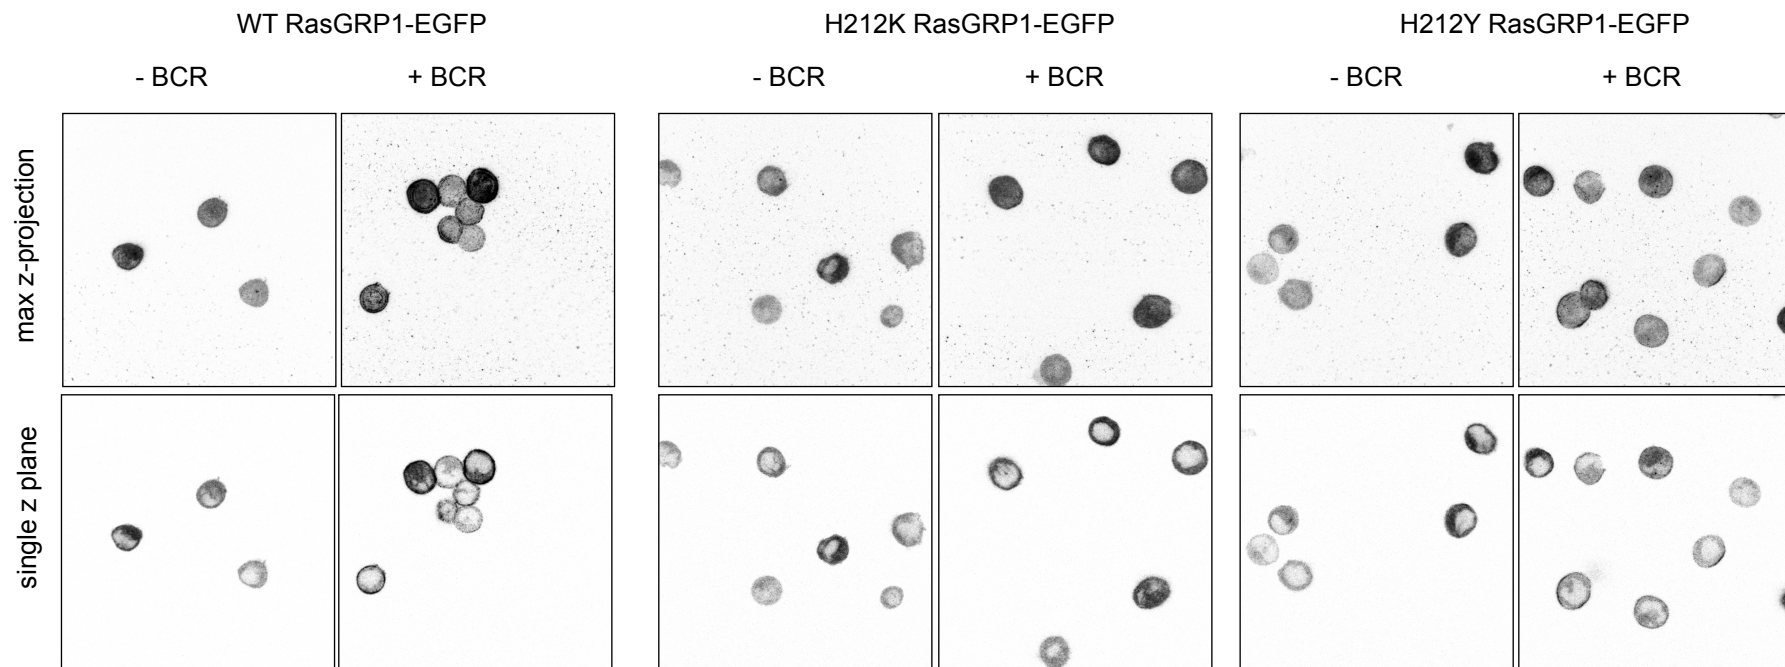**B**

GFP high gate

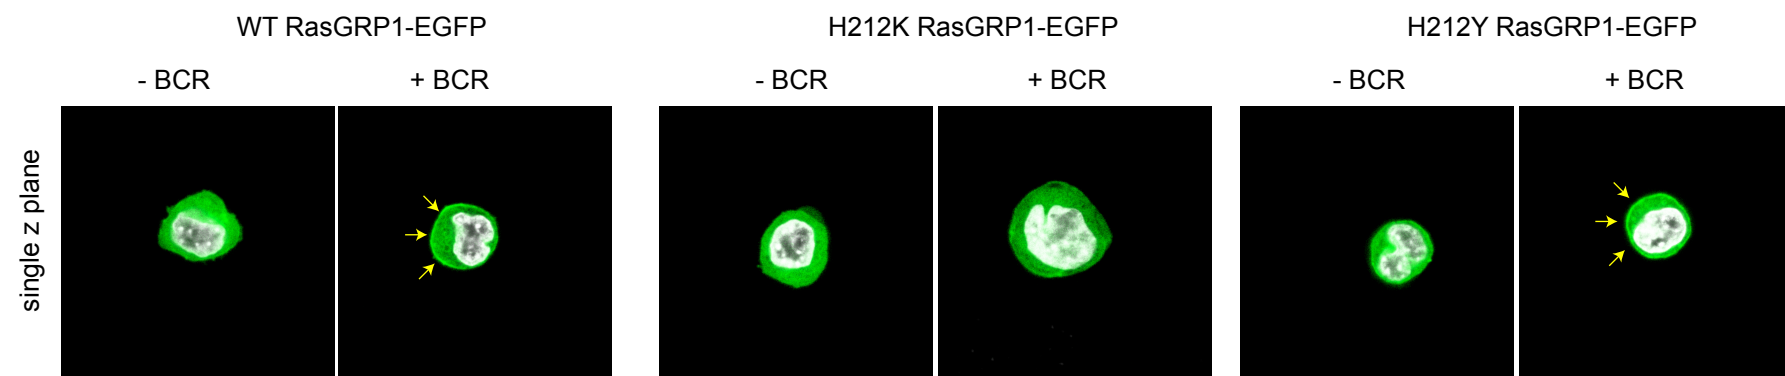

Supplement: supp [file elife-29002-supp-v1.zip]
